# Supplementary material for: Identification of candidate genes associating with soybean cyst nematode in soybean (Glycine max L.) using BSA-seq
Source: PeerJ. 2024 Oct 21;12:e18252. doi: 10.7717/peerj.18252 (PMC11505975; doi:10.7717/peerj.18252)
Supplement: Supplemental Information 5 [file peerj-12-18252-s005.xls]

## Sheet: Sheet1
ITEM TO CHECK	IMPORTANCE	CHECKLIST
EXPERIMENTAL DESIGN
Definition of experimental and control groups	E	Page 5, Line160-170
Number within each group	E	Page 5, Line160-170
Assay carried out by core lab or investigator's lab?	D	Page 5, Line160-170
Acknowledgement of authors' contributions	D	Systerm
SAMPLE
Description	E	Page 5, Line160-170
Volume/mass of sample processed	D	Page 5, Line160-170
Microdissection or macrodissection	E	Page 5, Line160-170
Processing procedure	E	Page 5, Line160-170
If frozen - how and how quickly?	E	Page 5, Line160-170
If fixed - with what, how quickly?	E	Page 5, Line160-170
Sample storage conditions and duration (especially for FFPE samples)	E	Page 5, Line160-170
NUCLEIC ACID EXTRACTION
Procedure and/or instrumentation	E	Page 5, Line160-170
Name of kit and details of any modifications	E	Page 5, Line160-170
Source of additional reagents used	D	Page 5, Line160-170
Details of DNase or RNAse treatment	E	Page 5, Line160-170
Contamination assessment (DNA or RNA)	E	Page 5, Line160-170
Nucleic acid quantification	E	Table S1
Instrument and method	E	Table S1
Purity (A260/A280)	D	Table S1
Yield	D	Table S1
RNA integrity method/instrument	E	FigureS1
RIN/RQI or Cq of 3' and 5' transcripts	E	FigureS1
Electrophoresis traces	D	FigureS1
Inhibition testing (Cq dilutions, spike or other)	E	Table S1
REVERSE TRANSCRIPTION
Complete reaction conditions	E	Page 5, Line160-170
Amount of RNA and reaction volume	E	Page 5, Line160-170
Priming oligonucleotide (if using GSP) and concentration	E	Page 5, Line160-170
Reverse transcriptase and concentration	E	Page 5, Line160-170
Temperature and time	E	Page 5, Line160-170
Manufacturer of reagents and catalogue numbers	D	Page 5, Line160-170
Cqs with and without RT	D*	Page 5, Line160-170
Storage conditions of cDNA	D	Page 5, Line160-170
qPCR TARGET INFORMATION
If multiplex, efficiency and LOD of each assay.	E	Page 5, Line160-170
Sequence accession number	E	Page 5, Line160-170
Location of amplicon	D	Page 5, Line160-170
Amplicon length	E	Page 5, Line160-170
In silico specificity screen (BLAST, etc)	E	Page 5, Line160-170
Pseudogenes, retropseudogenes or other homologs?	D	Page 5, Line160-170
Sequence alignment	D	Page 5, Line160-170
Secondary structure analysis of amplicon	D	Page 5, Line160-170
Location of each primer by exon or intron (if applicable)	E	Page 5, Line160-170
What splice variants are targeted?	E	Page 5, Line160-170
qPCR OLIGONUCLEOTIDES
Primer sequences	E	Table S2
RTPrimerDB Identification Number	D	Table S2
Probe sequences	D**	Table S2
Location and identity of any modifications	E	Table S2
Manufacturer of oligonucleotides	D	Table S2
Purification method	D	Table S2
qPCR PROTOCOL
Complete reaction conditions	E	Page 5, Line160-170
Reaction volume and amount of cDNA/DNA	E	Page 5, Line160-170
Primer, (probe), Mg++ and dNTP concentrations	E	Page 5, Line160-170
Polymerase identity and concentration	E	Page 5, Line160-170
Buffer/kit identity and manufacturer	E	Page 5, Line160-170
Exact chemical constitution of the buffer	D	Page 5, Line160-170
Additives (SYBR Green I, DMSO, etc.)	E	Page 5, Line160-170
Manufacturer of plates/tubes and catalog number	D	Page 5, Line160-170
Complete thermocycling parameters	E	Page 5, Line160-170
Reaction setup (manual/robotic)	D	Page 5, Line160-170
Manufacturer of qPCR instrument	E	Page 5, Line160-170
qPCR VALIDATION
Evidence of optimisation (from gradients)	D	Figure S2
Specificity (gel, sequence, melt, or digest)	E	Figure S2
For SYBR Green I, Cq of the NTC	E	Figure S2
Standard curves with slope and y-intercept	E	Figure S2
PCR efficiency calculated from slope	E	Figure S2
Confidence interval for PCR efficiency or standard error	D	Figure S2
r2 of standard curve	E	Figure S2
Linear dynamic range	E	Figure S2
Cq variation at lower limit	E	Figure S2
Confidence intervals throughout range	D	Figure S2
Evidence for limit of detection	E	Figure S2
If multiplex, efficiency and LOD of each assay.	E	Figure S2
DATA ANALYSIS
qPCR analysis program (source, version)	E	Page 5, Line160-170
Cq method determination	E	Page 5, Line160-170
Outlier identification and disposition	E	Page 5, Line160-170
Results of NTCs	E	Page 5, Line160-170
Justification of number and choice of reference genes	E	Page 5, Line160-170
Description of normalisation method	E	Page 5, Line160-170
Number and concordance of biological replicates	D	Page 5, Line160-170
Number and stage (RT or qPCR) of technical replicates	E	Page 5, Line160-170
Repeatability (intra-assay variation)	E	Page 5, Line160-170
Reproducibility (inter-assay variation, %CV)	D	Page 5, Line160-170
Power analysis	D	Page 5, Line160-170
Statistical methods for result significance	E	Page 5, Line160-170
Software (source, version)	E	Page 5, Line160-170
Cq or raw data submission using RDML	D	Page 5, Line160-170
Table 1. MIQE checklist for authors, reviewers and editors. All essential information (E) must be submitted with the manuscript. Desirable
information (D) should be submitted if available. If using primers obtained from RTPrimerDB, information on qPCR target, oligonucleotides,
protocols and validation is available from that source.
*: Assessing the absence of DNA using a no RT assay is essential when first extracting RNA. Once the sample has been validated as
RDNA-free, inclusion of a no-RT control is desirable, but no longer essential.
**: Disclosure of the probe sequence is highly desirable and strongly encouraged. However, since not all commercial pre-designed assay
vendors provide this information, it cannot be an essential requirement. Use of such assays is advised against.
