# Supplementary material for: Identification of candidate genes associating with soybean cyst nematode in soybean (Glycine max L.) using BSA-seq
Source: PeerJ. 2024 Oct 21;12:e18252. doi: 10.7717/peerj.18252 (PMC11505975; doi:10.7717/peerj.18252)
Supplement: Table S1 [file peerj-12-18252-s003.xlsx]

## Sheet: TableS1
Table S1 RNA quality assurance.
Sample	concentration (ng/μl)	volume (μl)	amount (ug)	OD
				260/280	260/230
H-10	537.59	40	21.5	2.26	2.09
Chidou4	821.84	40	32.87	2.27	2.36
