# Supplementary material for: Identification of candidate genes associating with soybean cyst nematode in soybean (Glycine max L.) using BSA-seq
Source: PeerJ. 2024 Oct 21;12:e18252. doi: 10.7717/peerj.18252 (PMC11505975; doi:10.7717/peerj.18252)
Supplement: Table S2 [file peerj-12-18252-s004.xlsx]

## Sheet: TableS2
Table S2 Primers used for qRT-PCR.
Primers	Sequence
ACINT7-F	GTTGGGATGGGTCAAAAGGA
ACTIN7-R	GGCAGGCACATTGAAGGTC
Glyma.02G211400-F	ACAAGGGATGTTTCAGCAAGG
Glyma.02G211400-R	CATCAATCCACGCACAGTCCT
Glyma.18G252800-F	ACAACGAACCCTATGGAGCAA
Glyma.18G252800-R	TGACGAAAGCGGTGAGGAG
Glyma.18G285800-F	ATGCCCATACTATTCTTCCTGC
Glyma.18G285800-R	CTTGATTCACTGCGGGAGG
Glyma.18G287400-F	CGTCGTATGATCGCCCTACTC
Glyma.18G287400-R	TGTGAATCGTCCCACCAGTAGT
Glyma.18G298200-F	TGCCATTCCTCTCTCCTTCC
Glyma.18G298200-R	GACCCAGCACTTCCAACTACAT
